# Supplementary material
Source: publisher site journal article supplement (https://www.dovepress.com/article/467886)
Supplement: Supplementary file 1 [file get_supplementary_file.php]

**Table S1** Primer sequences used for performing real-time PCR in the present work

| Target genes | Primers (5’ - 3’) (F: forwards; R: reverse) | Length (nt) | Accession number |
| --- | --- | --- | --- |
| *ALP* | F: GCCTCTCAGCTTCAGATCGT | 20 | XM_006239136.4 |
|  | R: CGCTCTTCCCCGTCTTACAG | 20 |
| *RUNX-2* | F: GCTGTTGTGATGCGTATTCCC | 21 | NM_001278484.2 |
|  | R: TGAACCTGGCCACTTGGTTT | 20 |
| *OCN* | F: ACTGCGTATTGGTTGACGCT | 20 | NM_25490.1 |
|  | R: AAAGACGCAAATGAACCGGAC | 21 |
| *OPN* | F: CAGTATCCCGATGCCACA | 18 | NM_012881.2 |
|  | R: TTTCCACGCTTGGTTCAT | 18 |
| *GAPDH* | F: AGACAGCCGCATCTTCTTGT | 20 | NM_017008.4 |
|  | R: CTTGCCGTGGGTAGAGTCAT | 20 |

**Abbreviations:** ALP, alkaline phosphatase; GAPDH, glyceraldehyde-3-phosphate dehydrogenase; OCN, osteocalcin; OPN, osteopontin; PCR, polymerase chain reaction; RUNX-2, Runt-related transcription factor 2.

**Table S2** Experimental design of the *in vivo* determination

| Subcutaneous implantation model in mice  (Time of sampling: week 2 and 4) | | Calvarial bone defect model in rats  (Time of sampling: week 6 and 12) | |
| --- | --- | --- | --- |
| Grouping | Number (n=24) | Grouping | Number (n = 48) |
| G | 6 | CTRL (without scaffolds) | 12 |
| G/T | 6 | G/T | 12 |
| G/T/GO | 6 | G/T/GO | 12 |
| G/T/GO/Cu | 6 | G/T/GO/Cu | 12 |

**Abbreviations:** CTRL, control group; G, GelMA hydrogel; G/T, GelMA/TCP hydrogel; G/T/GO, GO nanosheet-incorporated GelMA/TCP, hydrogel; G/T/GO/Cu, GO/Cu nanocomposite- incorporated GelMA/TCP hydrogel.


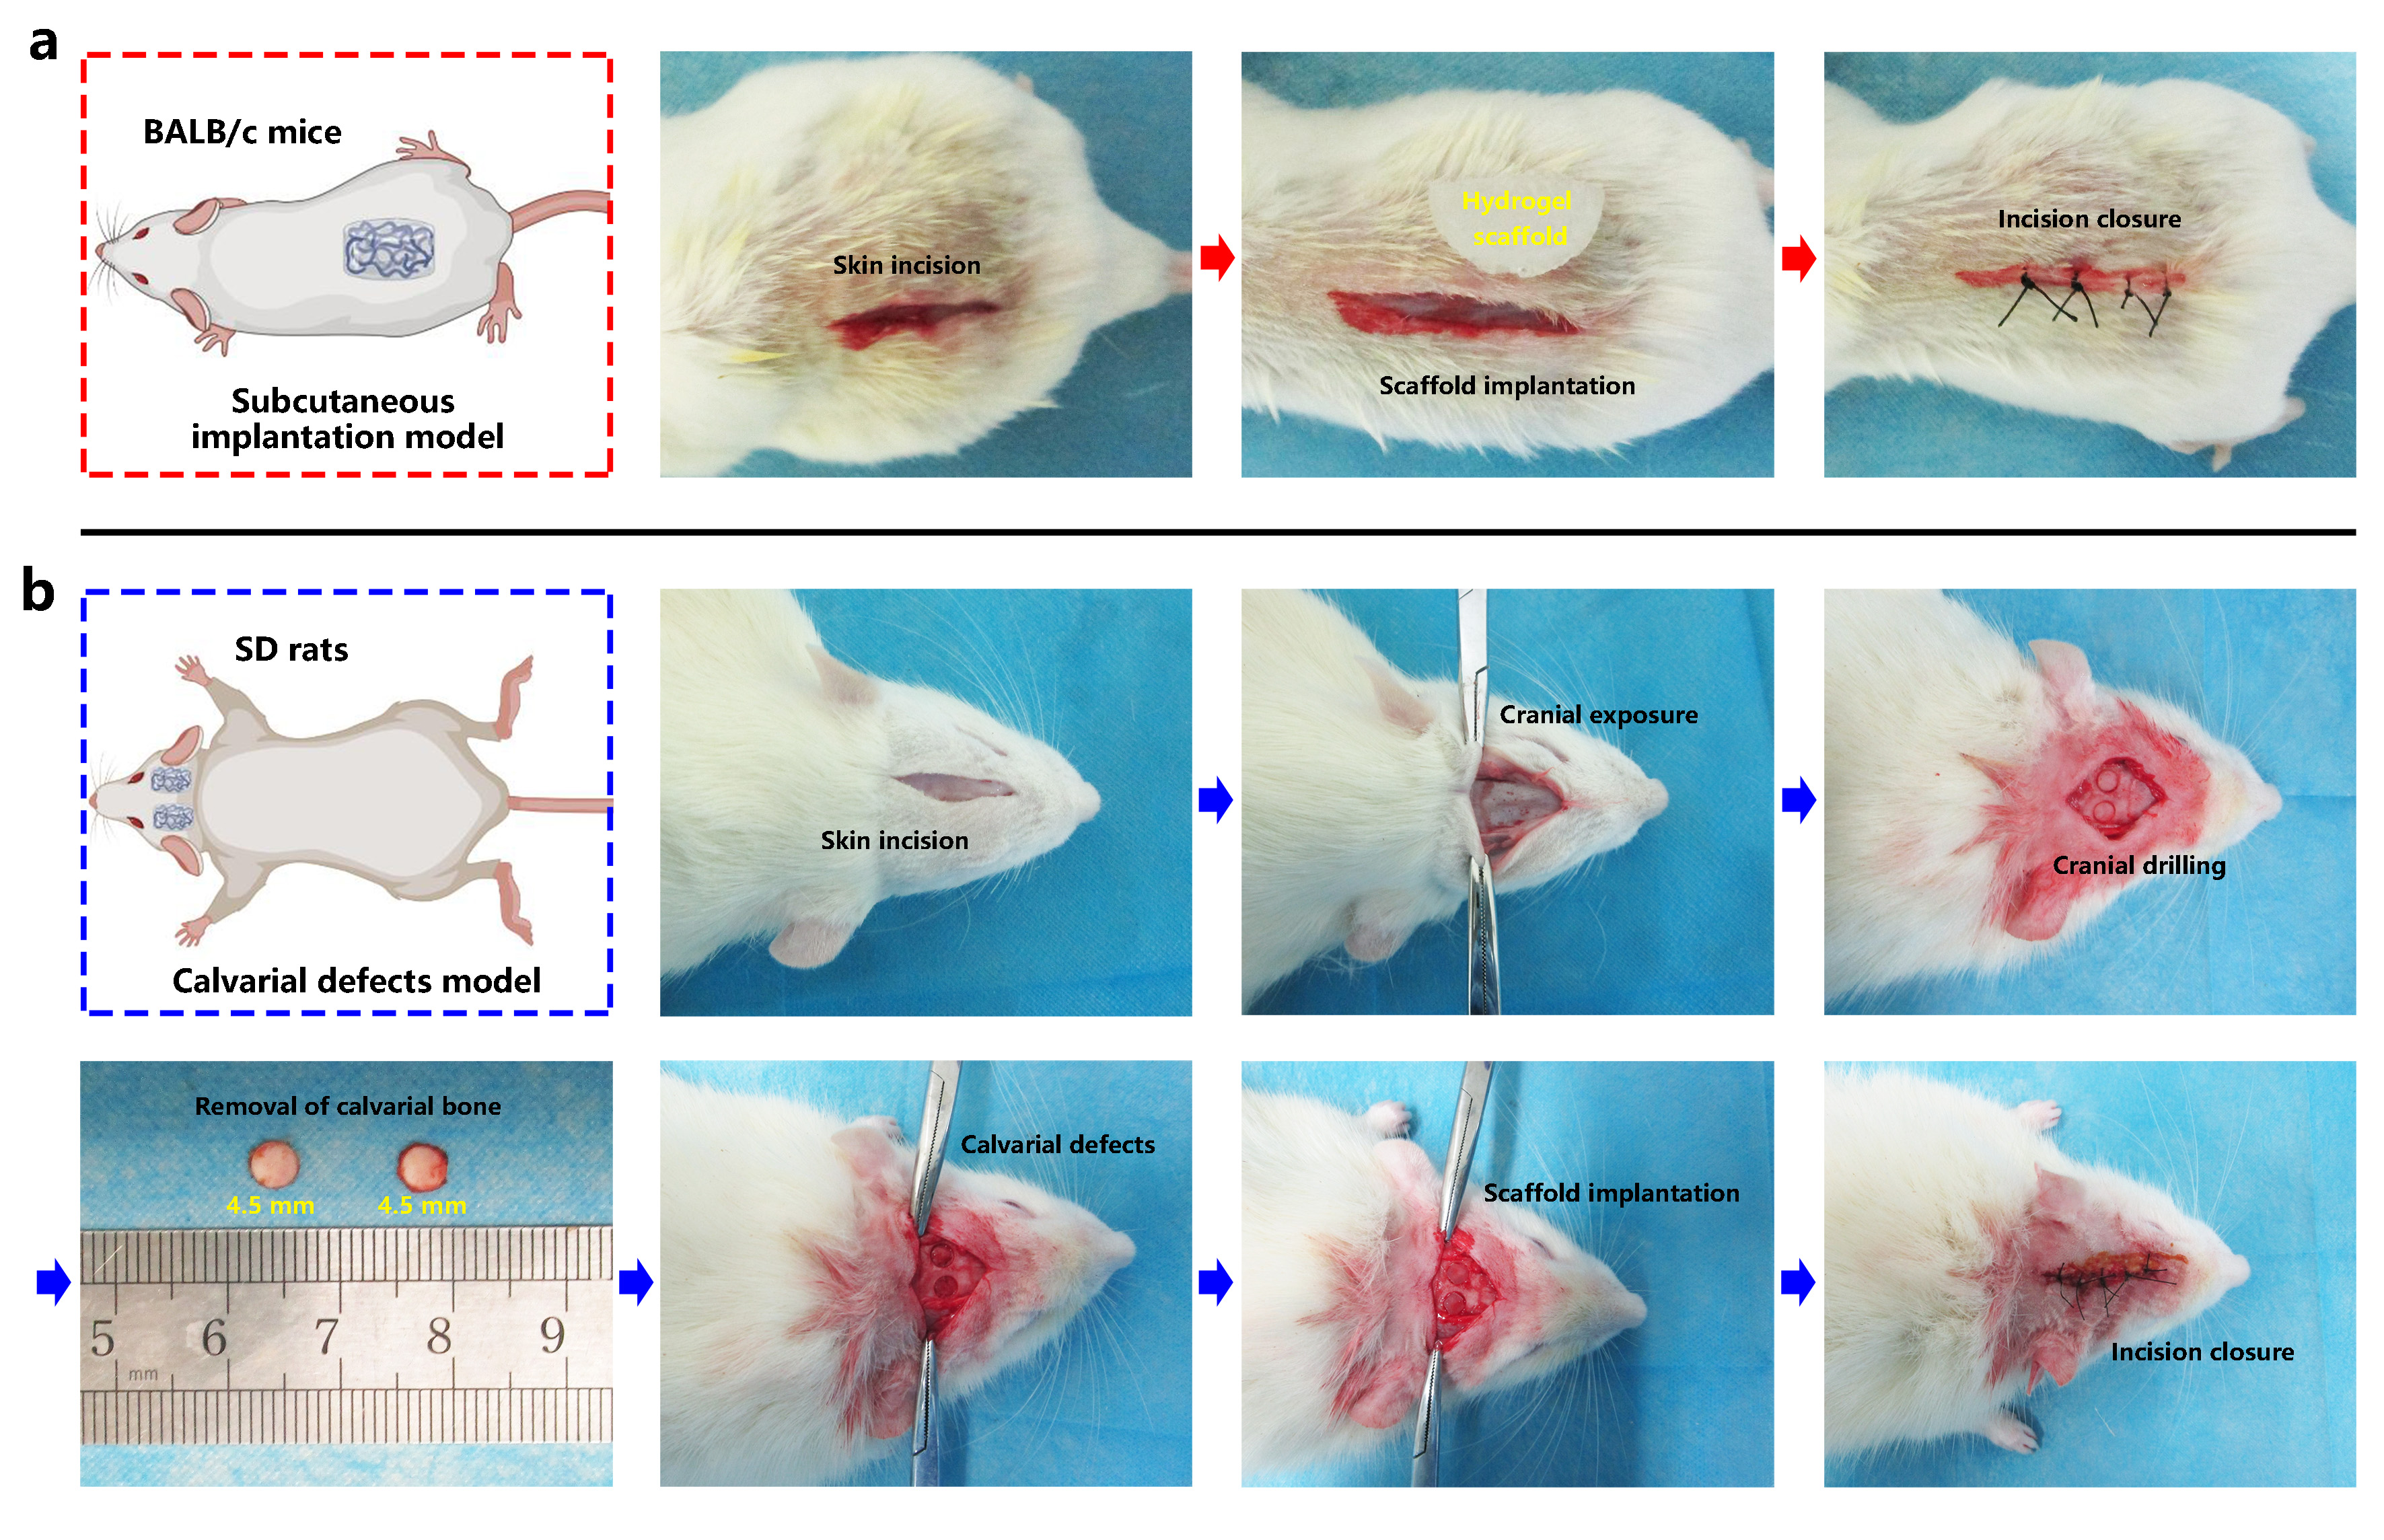


**Figure S1** Establishment of animal models and corresponding surgical procedures (created with BioRender.com).

**Notes: (a)** Subcutaneous implantation model in BALB/c mice. **(b)** Calvarial bone defect model in SD rats.


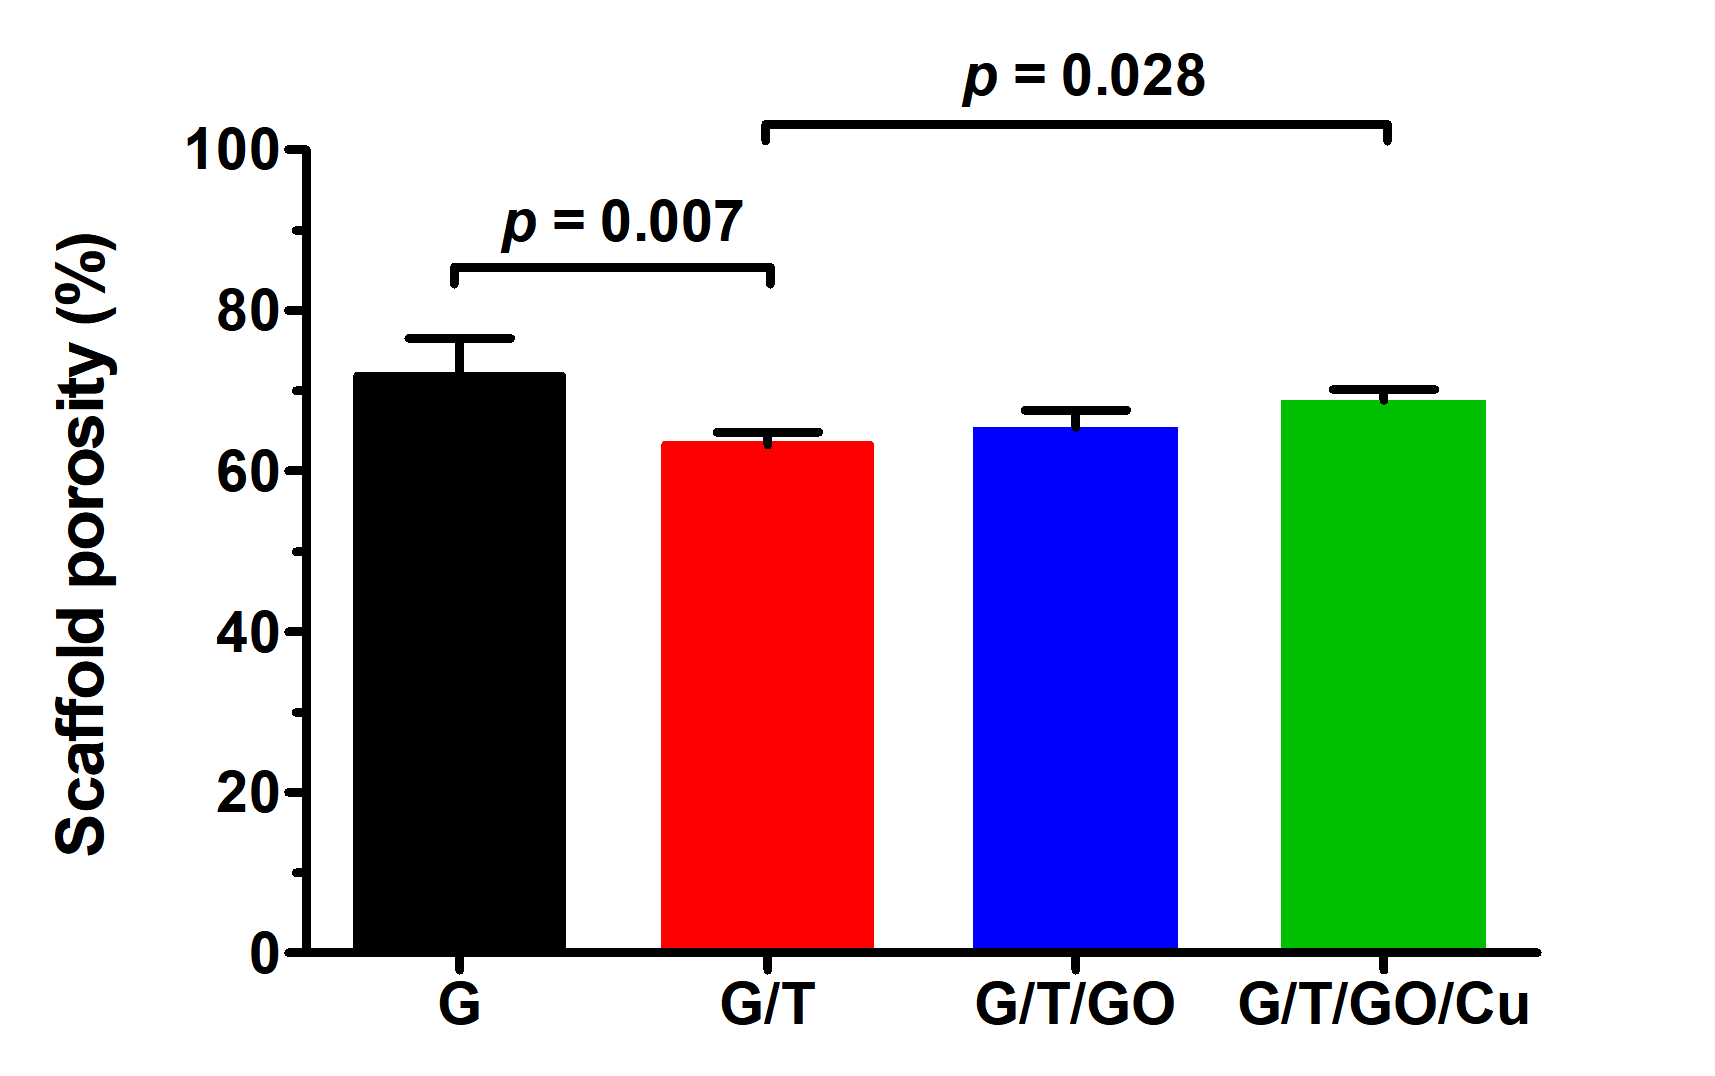


**Figure S2** The porosity of the prepared biohybrid hydrogel scaffolds (n = 5). Quantative analysis of these data was performed using Image J software.

**Abbreviations:** G, GelMA hydrogel; G/T, GelMA/TCP hydrogel; G/T/GO, GO nanosheet-incorporated GelMA/TCP, hydrogel; G/T/GO/Cu, GO/Cu nanocomposite- incorporated GelMA/TCP hydrogel.


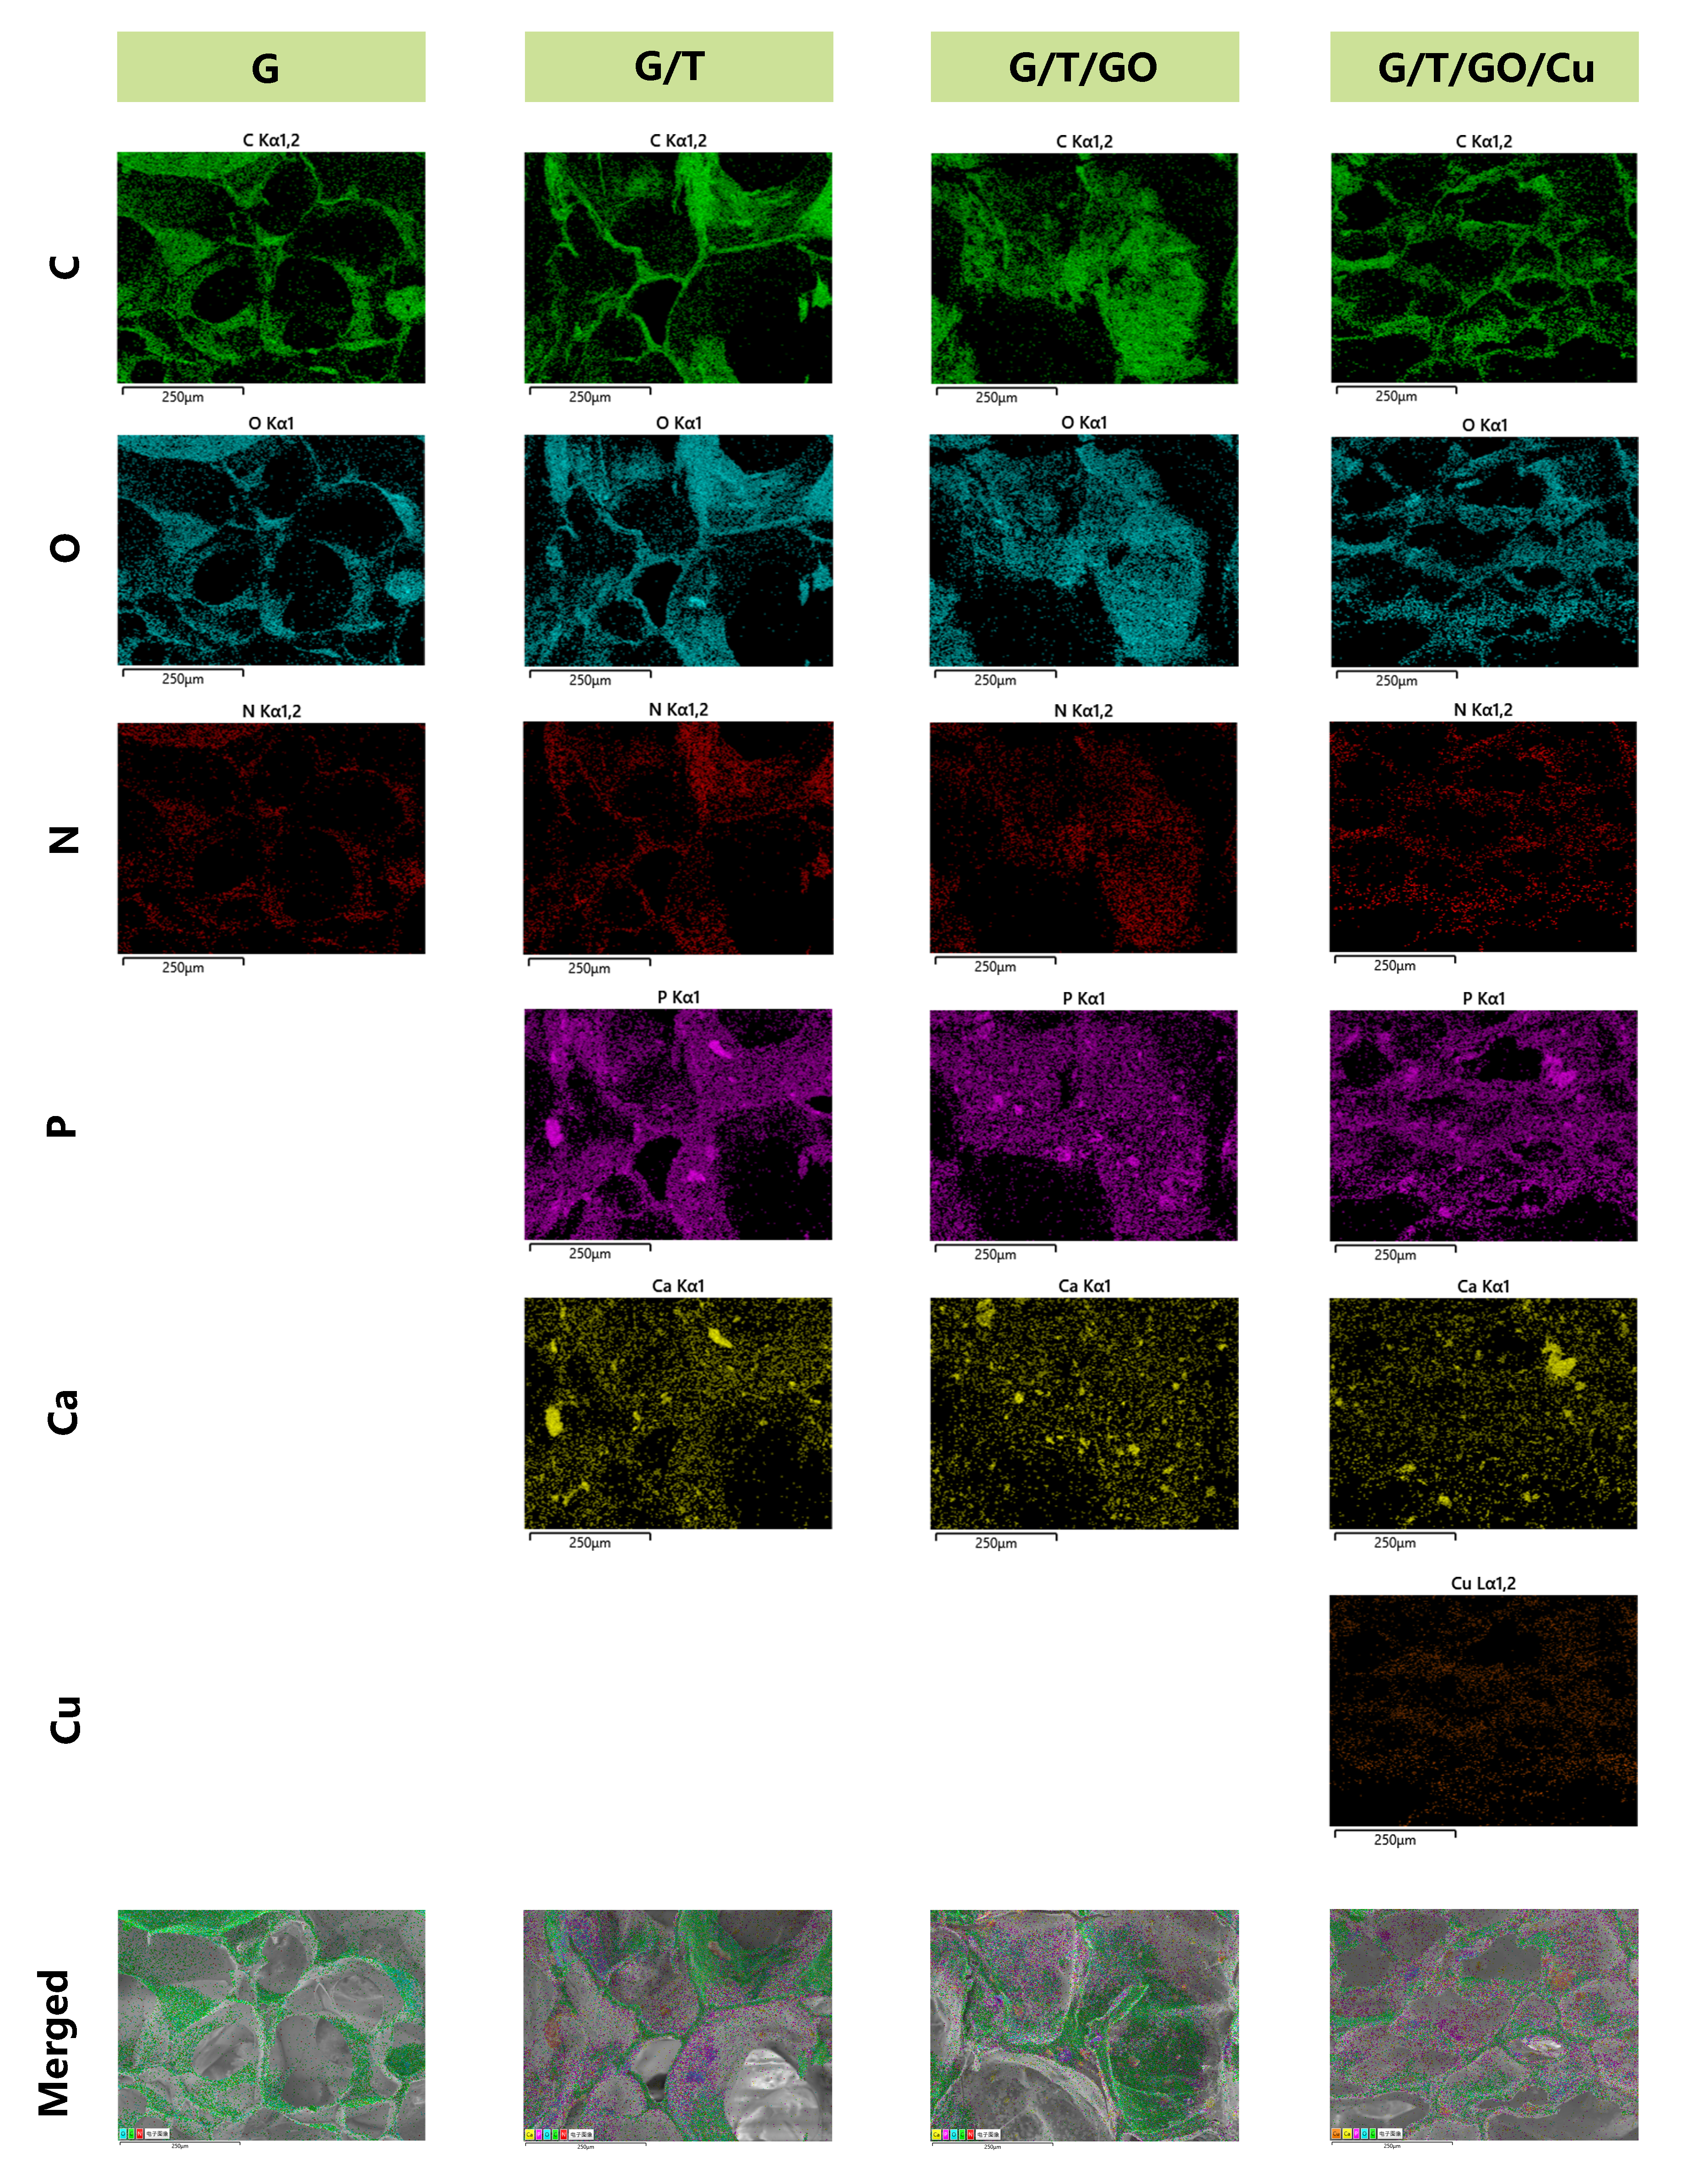


**Figure S3** EDS elemental mapping showing the elements distribution (C, O, N, P, Ca and Cu) of the hybrid hydrogel scaffolds.

**Abbreviations:** EDS, energy dispersive X-ray spectroscopy.


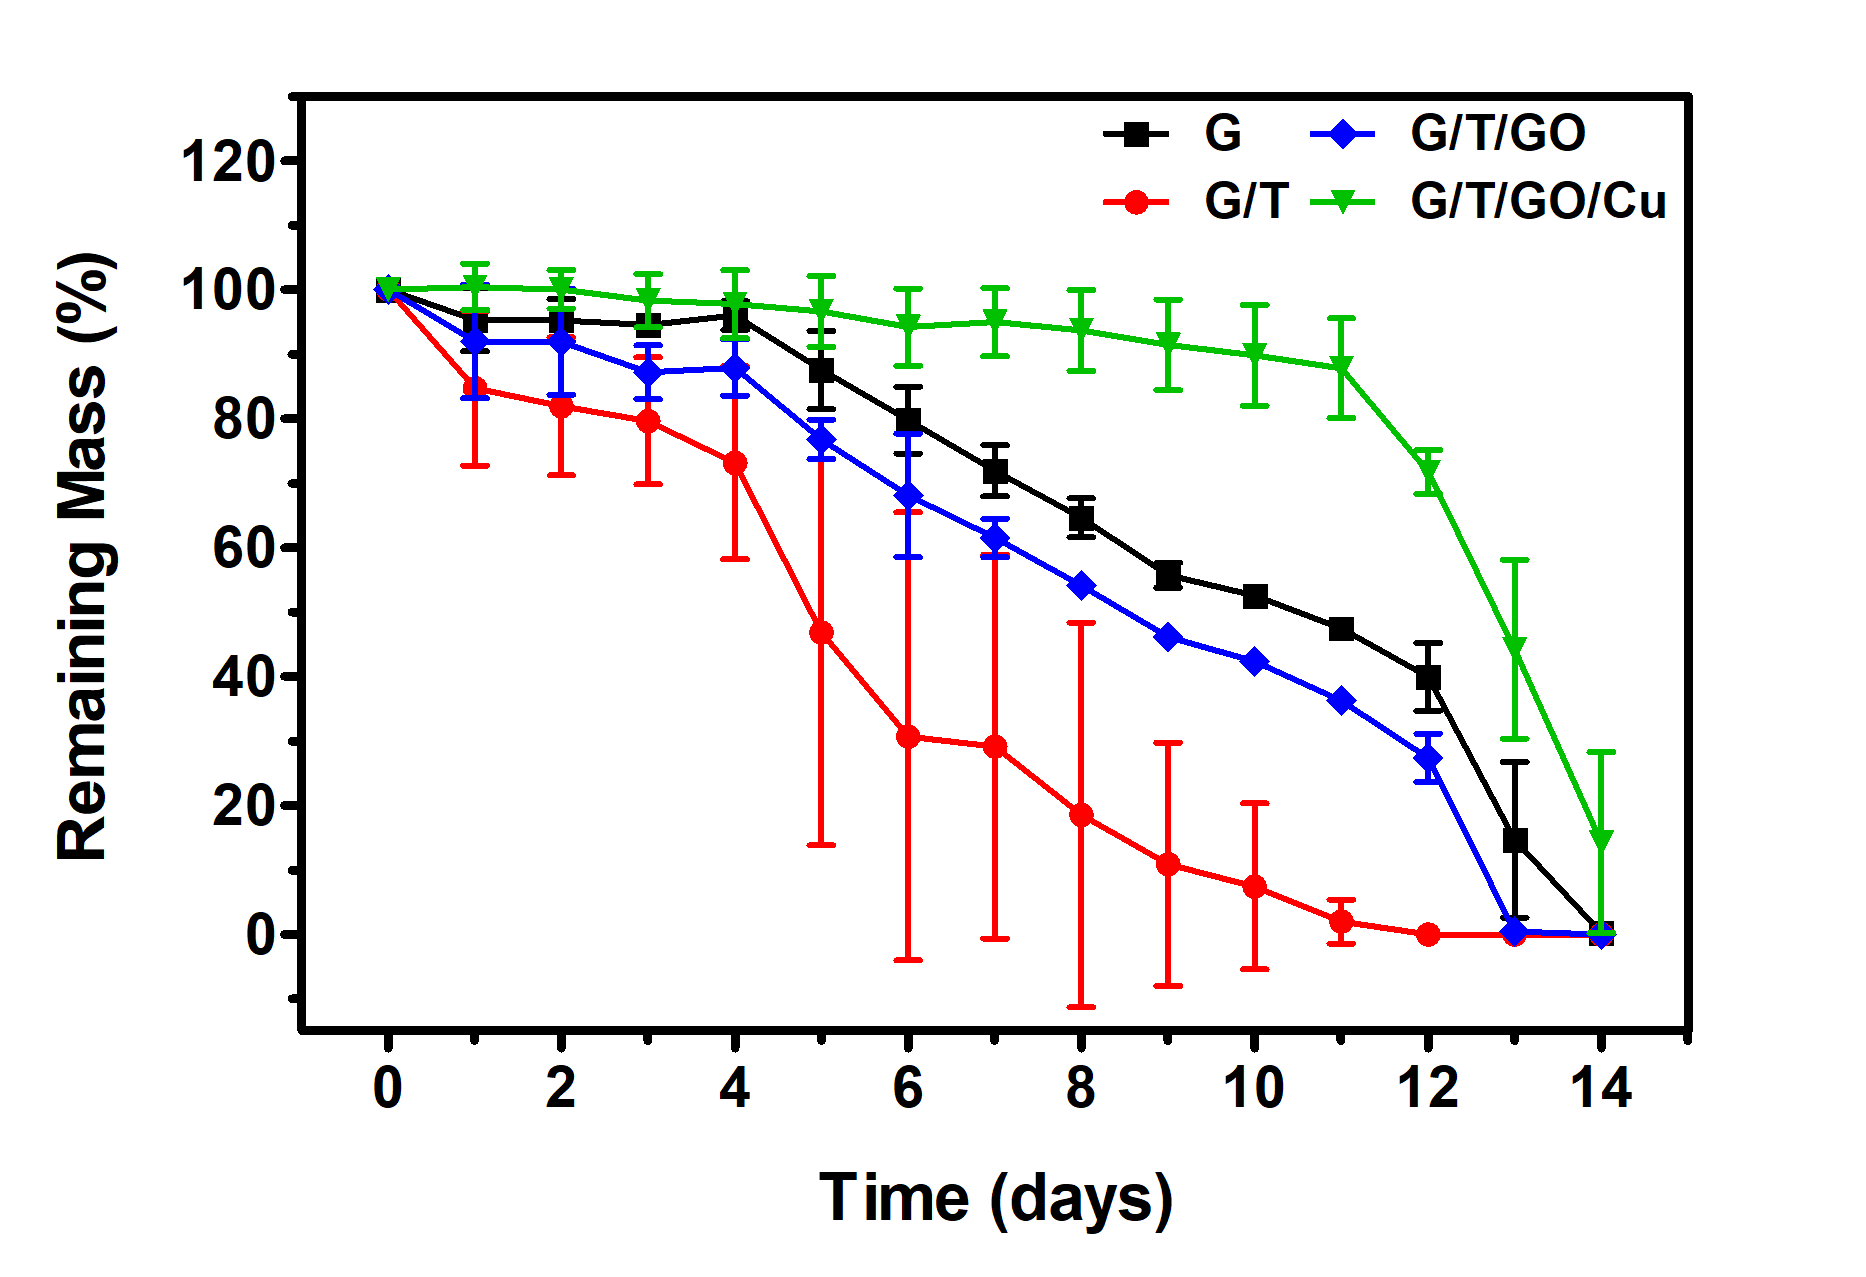


**Figure S4** *In vitro* degradation profile of the prepared hydrogel scaffolds (n = 3) incubated in PBS containing collagenase type II (1.5 U/mL) for two weeks.

**Abbreviations:** G, GelMA hydrogel; G/T, GelMA/TCP hydrogel; G/T/GO, GO nanosheet- incorporated GelMA/TCP, hydrogel; G/T/GO/Cu, GO/Cu nanocomposite- incorporated GelMA/TCP hydrogel.


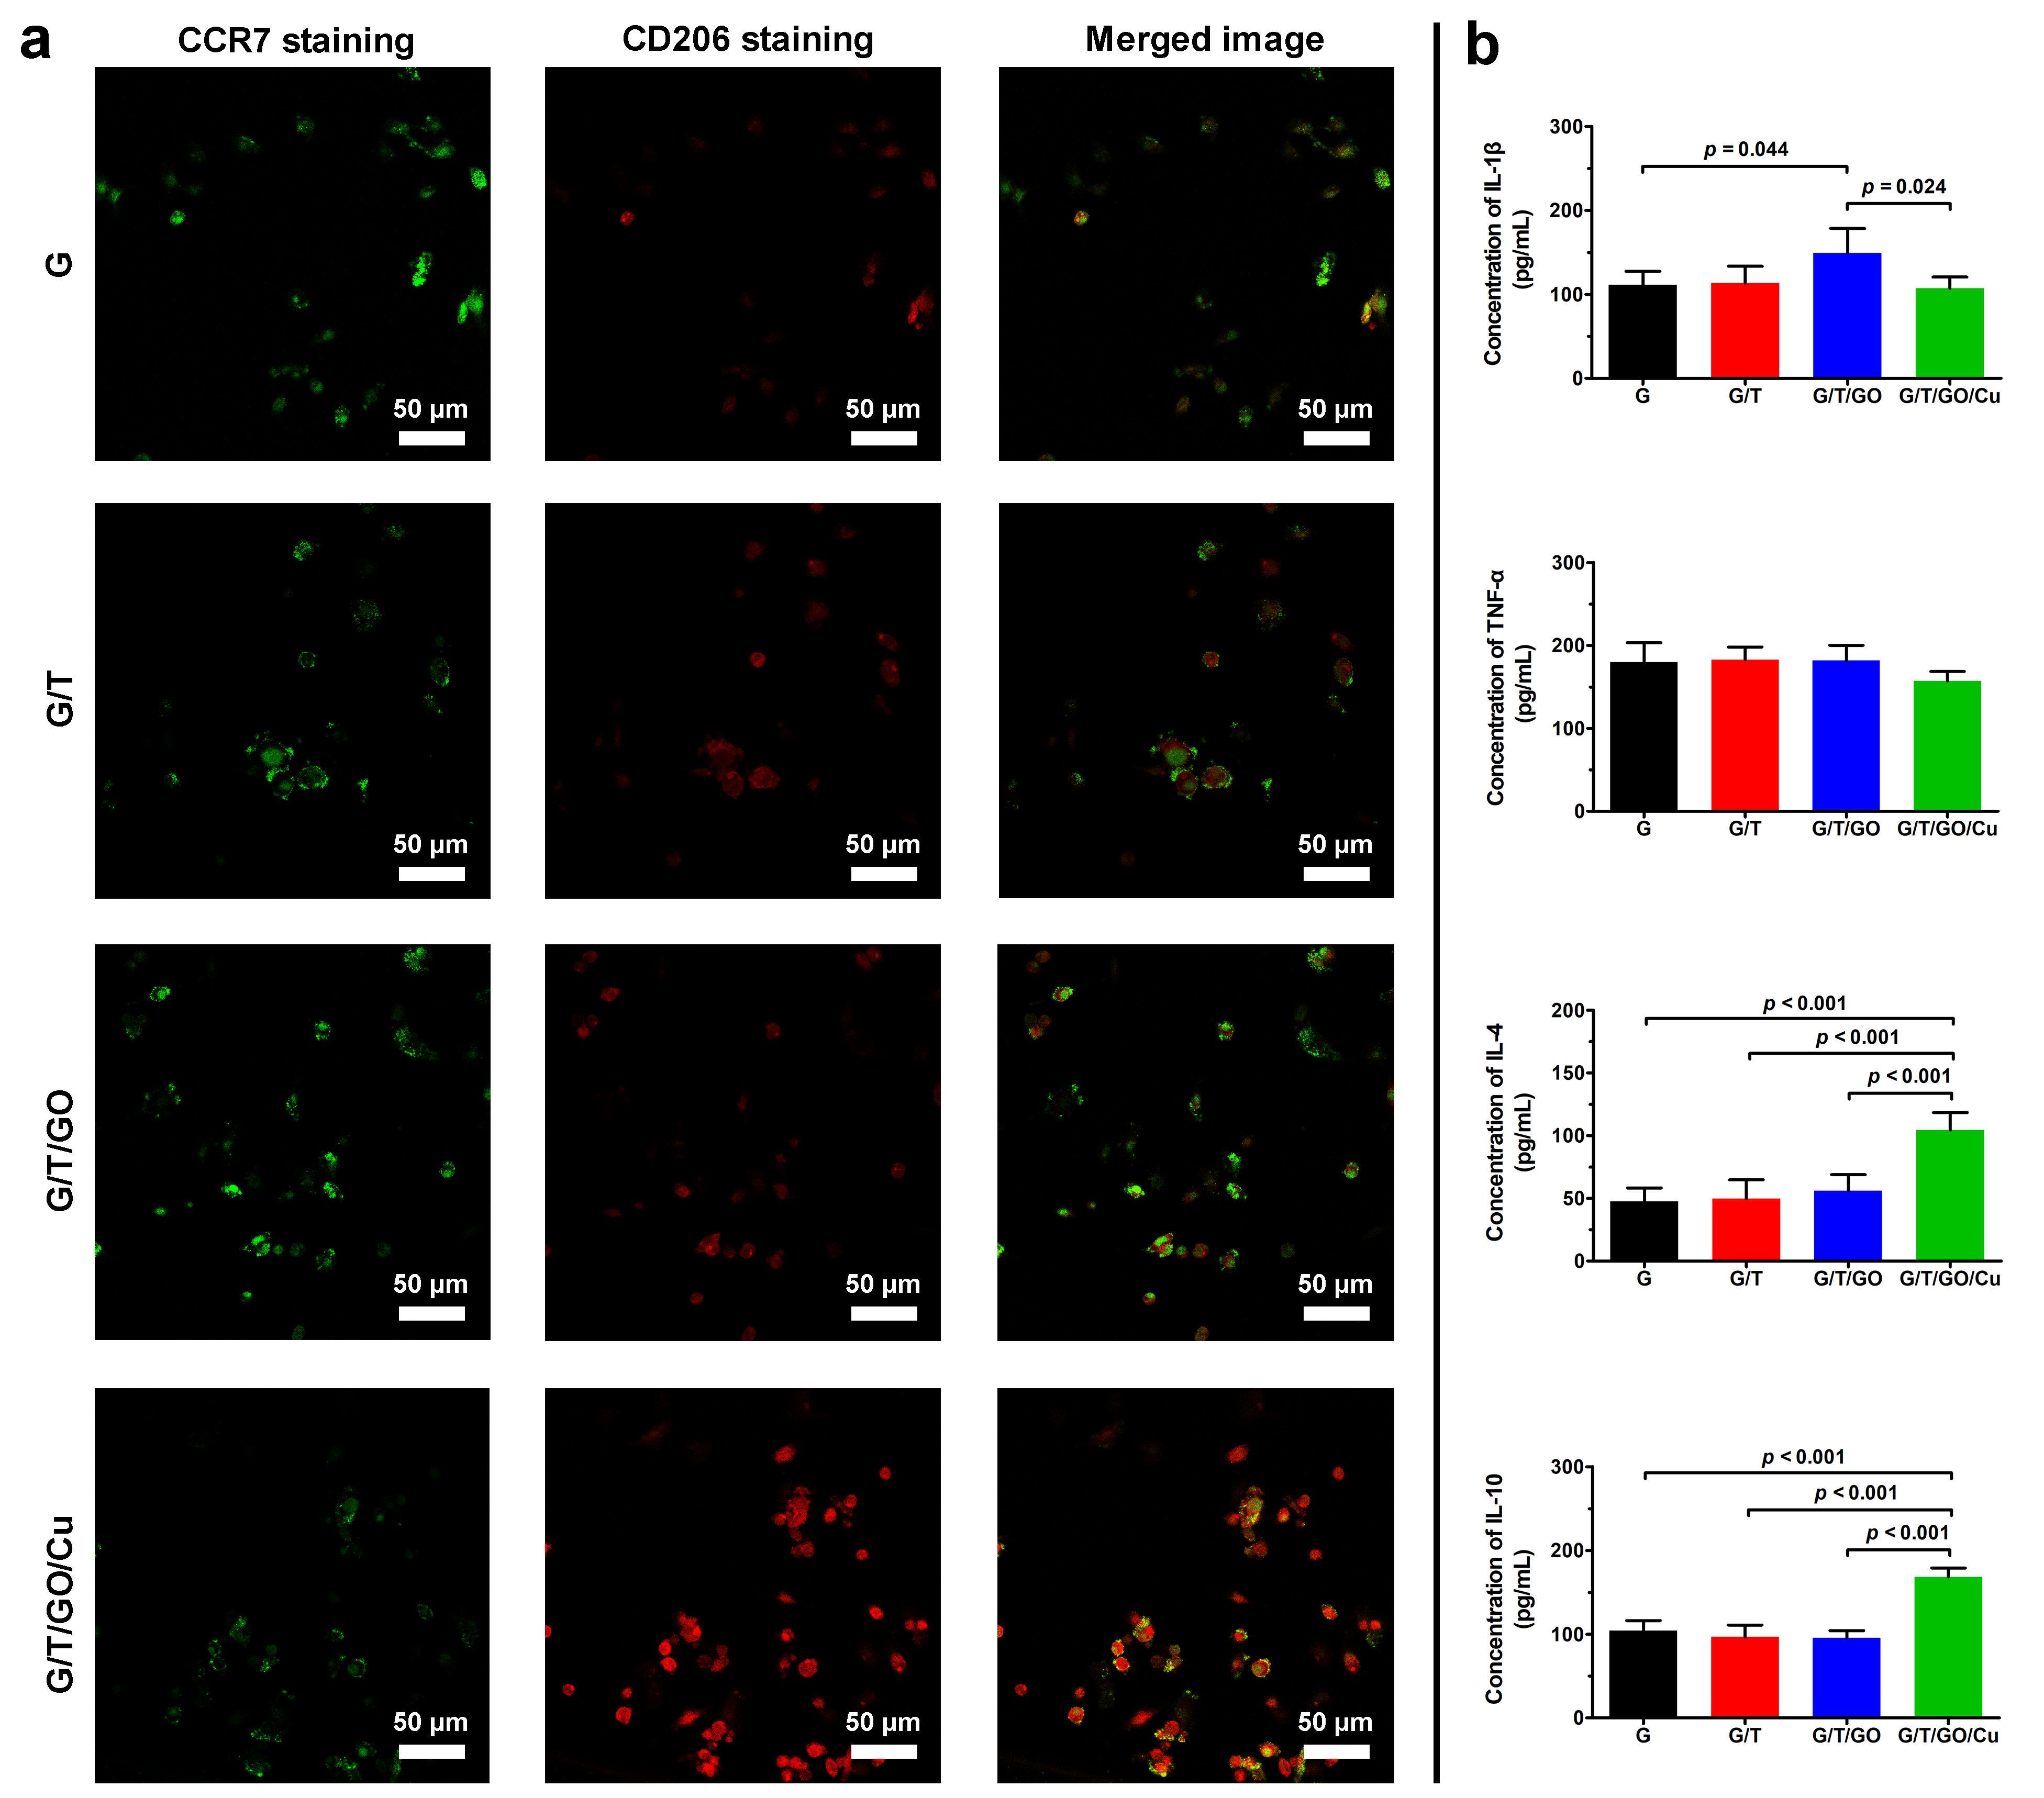


**Figure S5** Polarization and expression of inflammatory cytokines in RAW264.7 macrophages in the biohybrid hydrogel scaffolds after 48 h of coculture.

**Notes:** (a) Fluorescence staining and quantification of an M1 marker (CCR7) and M2 marker (CD206). (b) Expression levels of typical inflammatory cytokines (IL-1β, TNF-α, IL-4 and IL-10) determined by ELISA.

**Abbreviations:** CCR7, Chemokine C-C-Motif Receptor 7; CD206, Cluster of Differentiation 206; ELISA, enzyme-linked immunosorbent assay; IL-1β, interleukin 1β; IL-4 interleukin; IL-10, interleukin 10; TNF-α, tumor necrosis factor-α.


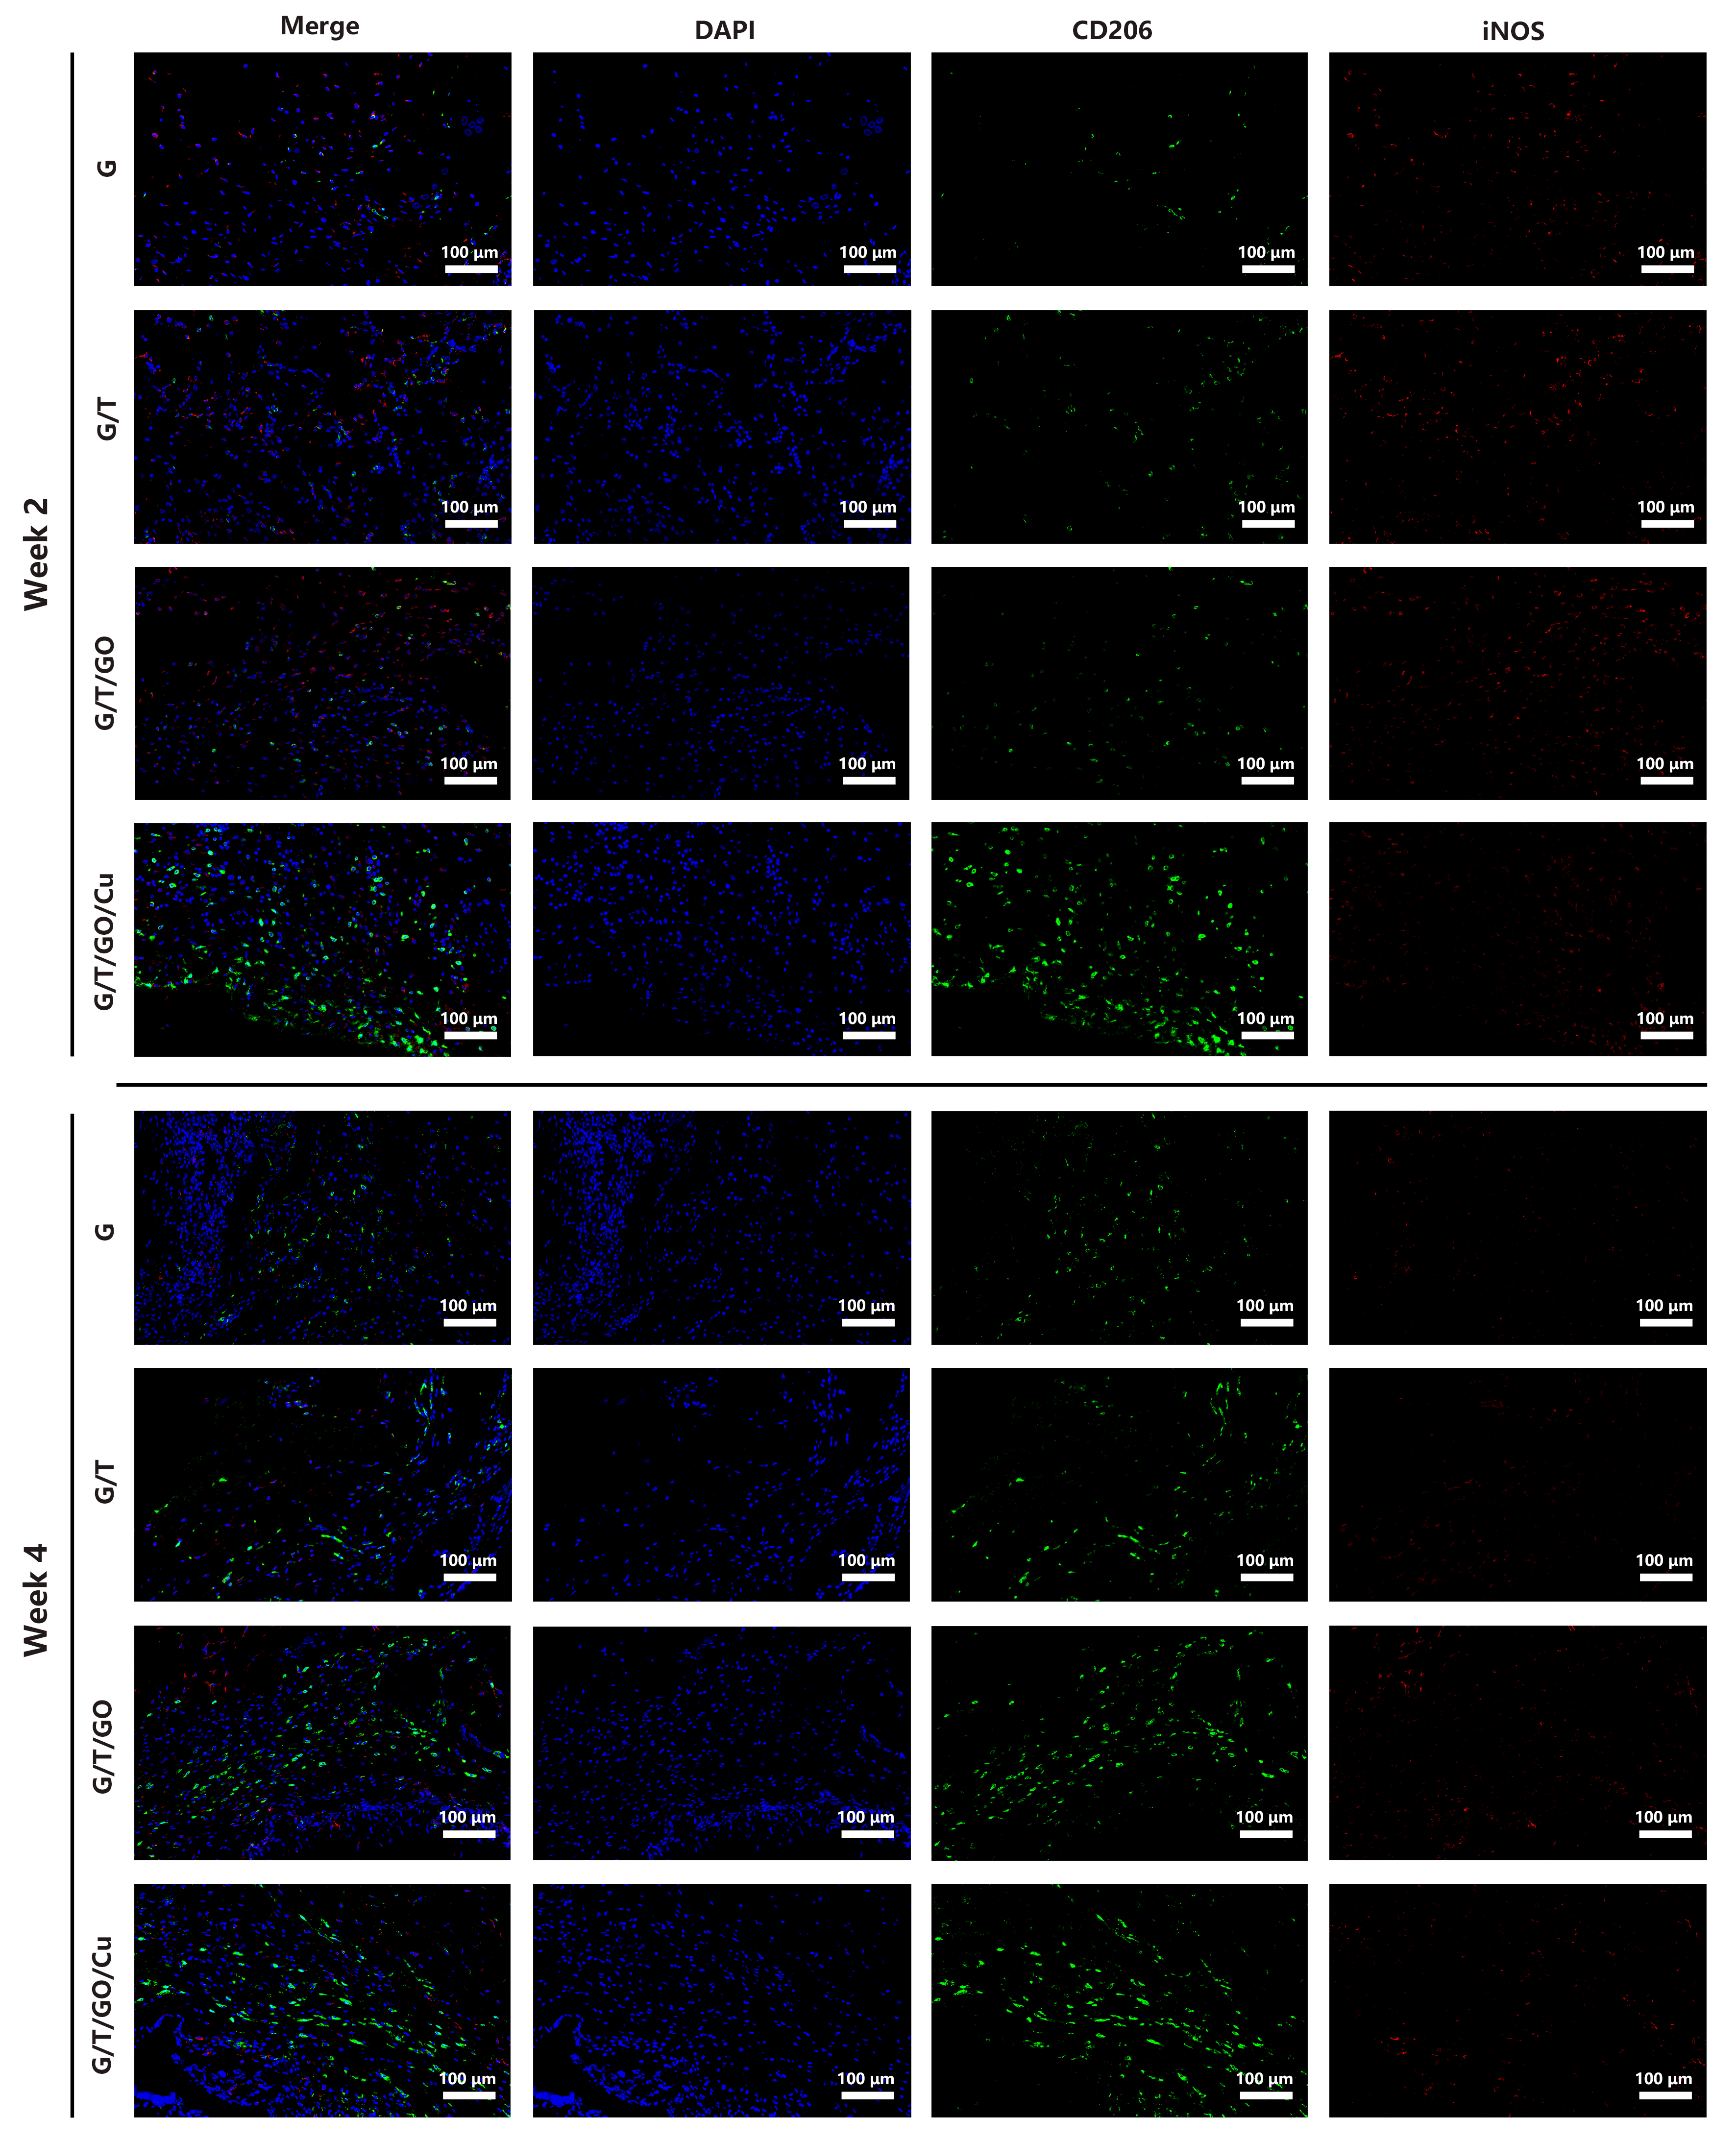


**Figure S6** Dual immunofluorescent staining of the biohybrid hydrogel scaffolds after 2 and 4 weeks of subcutaneous implantation in mice to clarify the *in vivo* effects of implanted hydrogel scaffolds on M1 (iNOS) and M2 (CD206) type polarization during macrophage recruitment.

**Abbreviations:** CD206, Cluster of Differentiation 206; DAPI, 4,6-diamidino-2-phenylindole; iNOS, inducible nitric-oxide synthase.


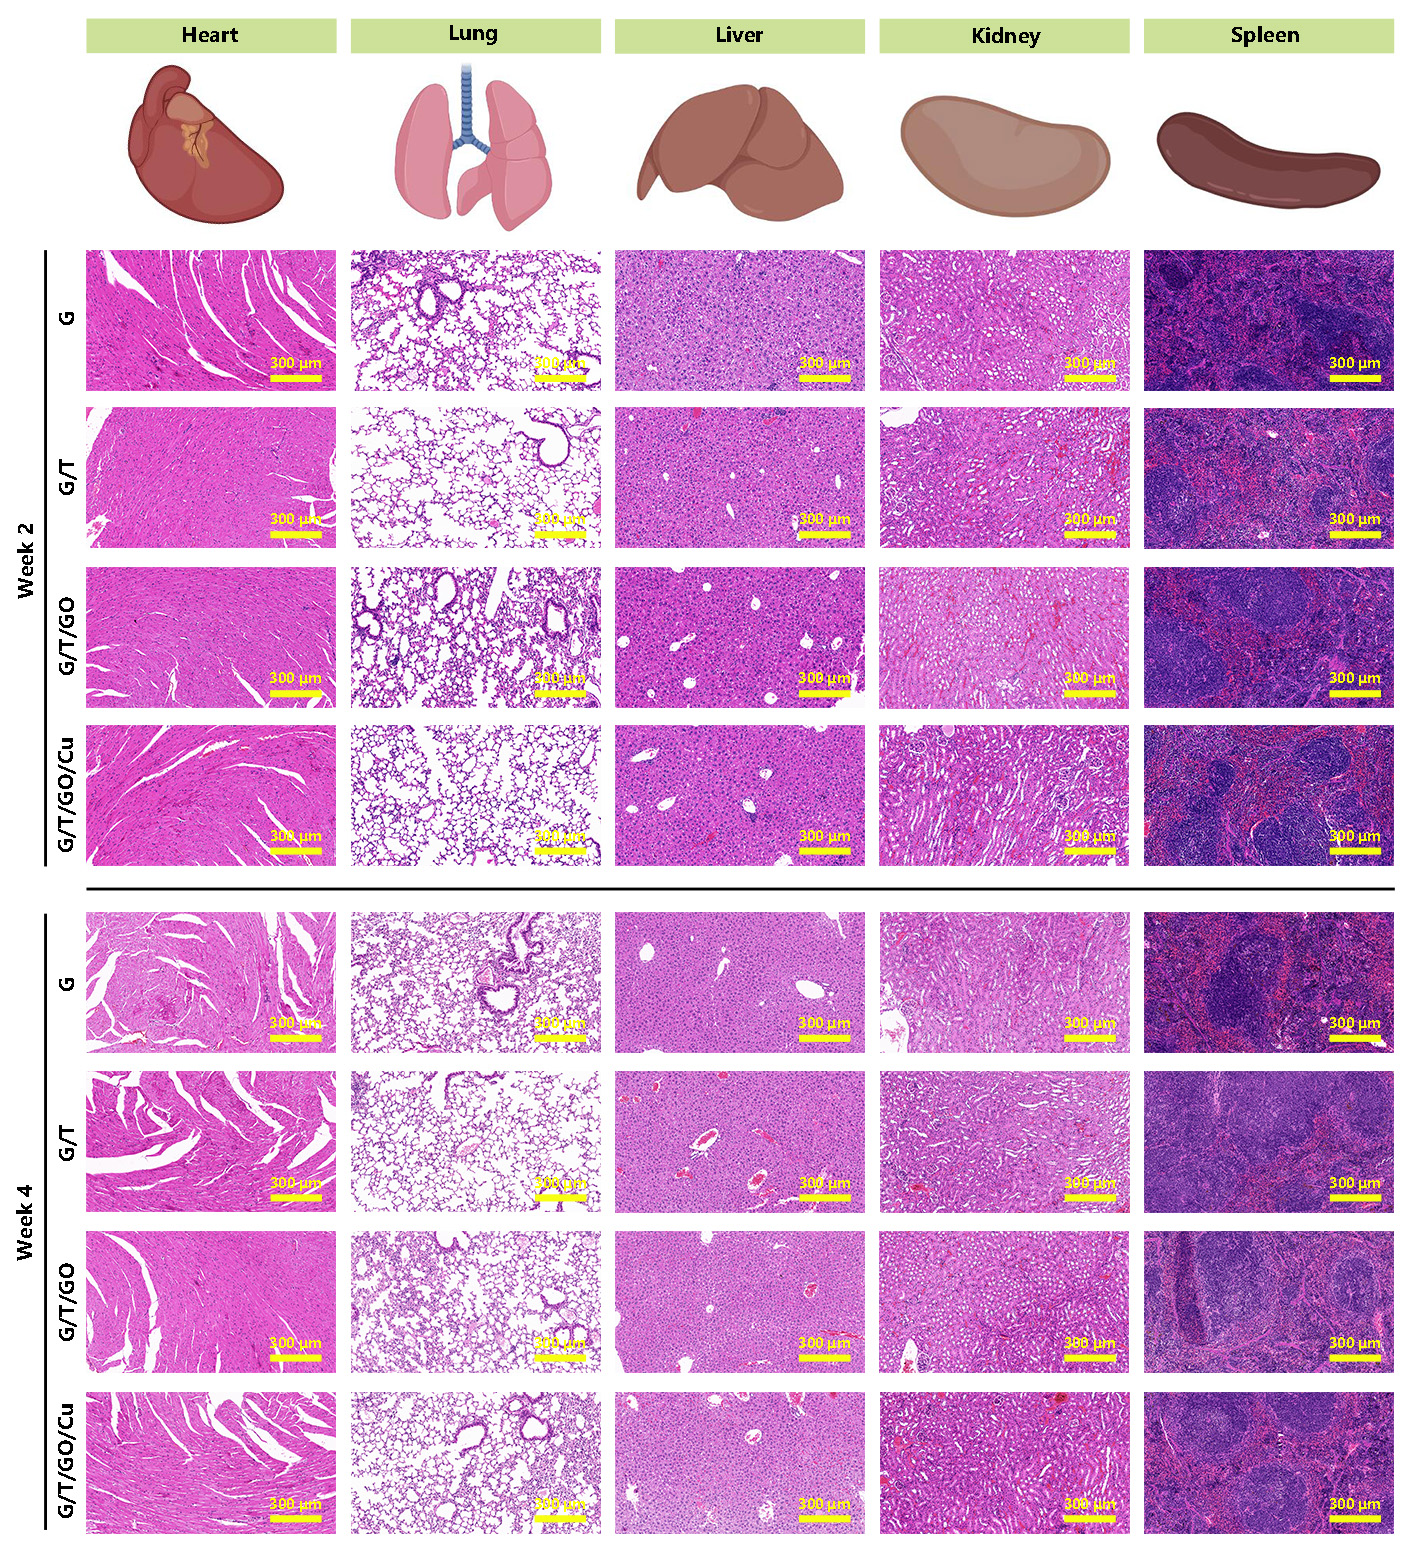


**Figure S7** Determination of the *in vivo* biosafety of the biohybrid hydrogel scaffolds exacted from BALB/c mice (created with BioRender.com).

**Notes:** Vital organs including heart, lung, liver, kidney and spleen were obtained at week 2 and 4 after implantation, followed by H&E staining to examine the organizational structures of these organs.
**Abbreviations:** H&E, hematoxylin and eosin.


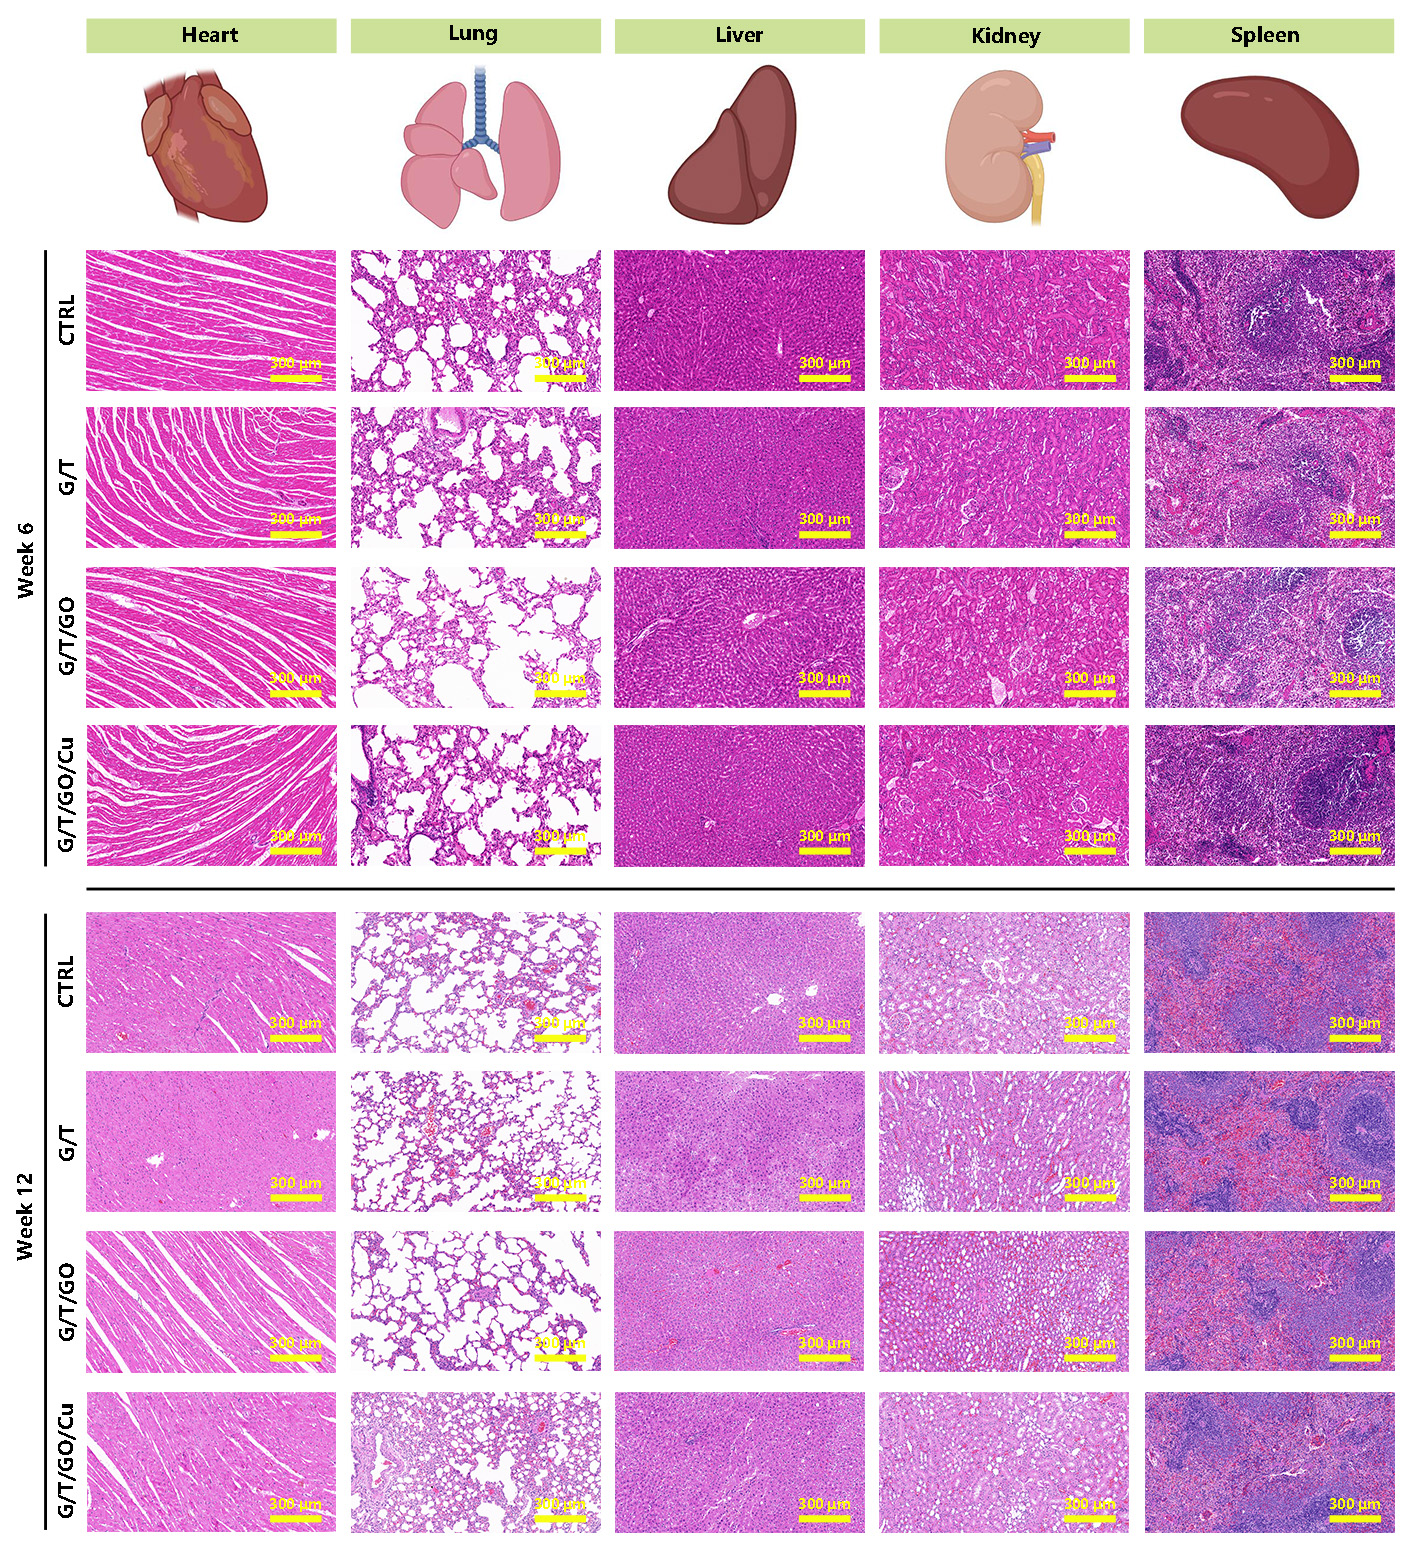


**Figure S8** Determination of the *in vivo* biosafety of the biohybrid hydrogel scaffolds exacted from SD rats (created with BioRender.com).

**Notes:** Vital organs including heart, lung, liver, kidney and spleen were obtained at week 6 and 12 after implantation, followed by H&E staining to examine the organizational structures of these organs.

**Abbreviations:** H&E, hematoxylin and eosin; SD, Sprague-Dawley.
